# Supplementary material for: A questionnaire survey study on nail disease prevalence in patients under podologic foot care
Source: Atypon-hosted journal article supplement (doi:10.1024/0301-1526/a000967), 2021-11-01
Supplement: 0301-1526_a000967_esm2.pdf [file 0301-1526_a000967_esm2.pdf]

**ESM 2.** Frequency of nail disorders in dependence of age, gender, BMI and diagnosis of DM

|                          | Onychomycosis        | Unguis convolutus    | Onychausis        | Unguis incarnatus  | Onycholysis          |
|--------------------------|----------------------|----------------------|-------------------|--------------------|----------------------|
| Male, n (%)              | 277 (38.31%)         | 268 (37.07%)         | 224 (30.98%)      | 131 (18.12%)       | 84 (11.62%)          |
| [95%- CI]                | [34.75 - 41.97]      | [33.54 - 40.70]      | [27.63 - 34.49]   | [15.38 - 21.12]    | [09.37 - 14.18]      |
| Female, n (%)            | 203 (22.66%)         | 423 (47.21%)         | 260 (29.02%)      | 217 (24.22%)       | 141 (15.74%)         |
| [95%-CI]                 | [19.95 - 25.54]      | [43.90 - 50.54]      | [26.06 - 32.11]   | [21.45 - 27.16]    | [13.41 - 18.29]      |
| p-value                  | <b>&lt;0.0001</b>    | <b>&lt;0.0001</b>    | 0.4128            | <b>0.0035</b>      | <b>0.0172</b>        |
| Diabetes mellitus, n (%) | 324 (32.83%)         | 442 (44.78%)         | 313 (31.71%)      | 191 (19.35%)       | 130 (13.17%)         |
| [95%- CI]                | [29.90 - 35.85]      | [41.65 - 47.95]      | [28.82 - 34.72]   | [16.93 - 2.96]     | [11.12 - 15.44]      |
| Non Diabetes mel., n (%) | 156 (24.68%)         | 249 (39.40%)         | 171 (27.06%)      | 157 (24.84%)       | 95 (15.03%)          |
| [95%- CI]                | [21.37 - 28.24]      | [35.57 - 43.33]      | [23.63 - 30.70]   | [21.52 - 28.40]    | [12.33 - 18.06]      |
| p-values                 | <b>0.0004</b>        | <b>0.0347</b>        | 0.0514            | <b>0.0092</b>      | 0.3030               |
| Age, Mean ± SD           | 70.89 ± 11.76        | 69.25 ± 12.69        | 70.86 ± 11.36     | 67.26 ± 13.99 [68] | 68.25 ± 13.24        |
| [Median]                 | [72.50]              | [71.00]              | [72.00]           |                    | [69.00]              |
| p-value                  | <b>&lt;0.0001</b>    | 0.0553               | <b>&lt;0.0001</b> | 0.0743             | 0.7858               |
| Age < 60y, n (%)         | 73.00 (19.95%)       | 149 (40.71%)         | 76 (20.77%)       | 98 (26.78%)        | 55 (15.03%)          |
| [95%- CI]                | [15.97 - 24.41]      | [35.63 - 45.94]      | [16.72 - 25.29]   | [22.31 - 31.63]    | [11.53 - 19.11]      |
| Age > 75y, n (%)         | 196 (35.70%)         | 247(44.99%)          | 187 (34.06%)      | 117 (21.31%)       | 78 (14.21%)          |
| [95%- CI]                | [31.69 - 39.87]      | [40.78 - 49.26]      | [30.10 - 38.19]   | [17.96 - 24.98]    | [11.40 - 17.41]      |
| BMI, mean ± SD           | 28.54 ± 6.49 [27.76] | 29.42 ± 7.03 [28.40] | 29.44 ± 6.76      | 29.15 ± 13.54      | 28.00 ± 6.85 [27.29] |
| [Median]                 |                      |                      | [28.40]           | [27.76]            |                      |
| p- value                 | 0.8086               | <b>&lt;0.0001</b>    | <b>0.0014</b>     | 0.6130             | 0.0646               |
| BMI < 25, n (%)          | 129 (27.16%)         | 188 (39.58%)         | 118 (24.84%)      | 104 (21.89%)       | 79 (16.63%)          |
| [95%- CI]                | [23.21 - 31.40]      | [35.15 - 44.14]      | [21.02 - 28.98]   | [18.26 - 25.89]    | [13.39 - 20.29]      |
| BMI > 30 N (%)           | 157 (28.91%)         | 274 (50.46%)         | 179 (32.97%)      | 127 (23.39%)       | 66 (12.15%)          |
| [95%-CI]                 | [25.13 - 32.93]      | [46.17 - 54.75]      | [29.02 - 37.10]   | [19.89 - 27.18]    | [09.53 - 15.20]      |

Notes. Provided are the total numbers (n), the rates (%), the confidence intervals (CI), p-values of Fischer's exact tests or Kruskal-Wallis tests, respectively.

Bold numbers indicate p-value <0.05.
