# Supplementary material for: A questionnaire survey study on nail disease prevalence in patients under podologic foot care
Source: Atypon-hosted journal article supplement (doi:10.1024/0301-1526/a000967), 2021-11-01
Supplement: 0301-1526_a000967_esm3.pdf [file 0301-1526_a000967_esm3.pdf]

**ESM 3.** Frequency and associations of patient characteristics and comorbidities with nail disorders

|                            | Onychomycosis<br>n = 480 (29.65 %) | Unguis convolutus<br>n = 691 (42.68%) | Onychauxis<br>n = 484 (29.89%) | Unguis incarnatus<br>n = 348 (21.49%) | Onycholysis<br>n= 225 (13.90%) |
|----------------------------|------------------------------------|---------------------------------------|--------------------------------|---------------------------------------|--------------------------------|
| Age “>75 years”, n (%)     | 196 (35.70%)                       | 247 (44.99%)                          | 187 (34.06%)                   | 117 (21.31%)                          | 78 (14.21%)                    |
| OR adjusted                | 1.382                              | 1.074                                 | 1.233                          | 1.012                                 | 0.867                          |
| [95%- CI]                  | <b>[1.094 - 1.746]</b>             | [0.862 - 1.338]                       | [0.978 - 1.553]                | [0.778 - 1.316]                       | [0.635 - 1.183]                |
| Gender “male”, n (%)       | 277 (38.31%)                       | 268 (37.07%)                          | 224 (30.98%)                   | 131 (18.12%)                          | 84 (11.62%)                    |
| OR adjusted                | 2.013                              | 0.600                                 | 1.038                          | 0.751                                 | 0.680                          |
| [95%- CI]                  | <b>[1.608 - 2.520]</b>             | <b>[0.486 - 0.740]</b>                | [0.832 - 1.296]                | <b>[0.584 - 0.965]</b>                | <b>[0.503 - 0.919]</b>         |
| Obesity “BMI ≥ 30”, n (%)  | 157 (28.91%)                       | 274 (50.46%)                          | 179 (32.97%)                   | 127 (23.39%)                          | 66 (12.15%)                    |
| OR adjusted                | 0.867                              | 1.545                                 | 1.186                          | 1.253                                 | 0.737                          |
| [95%- CI]                  | [0.678 - 1.111]                    | <b>[1.234 - 1.936]</b>                | [0.933 - 1.507]                | [0.958 - 1.639]                       | [0.529 - 1.028]                |
| Diabetes mellitus, n (%)   | 324 (32.83%)                       | 442 (44.78%)                          | 313 (31.71%)                   | 191 (19.35%)                          | 130 (13.17%)                   |
| OR adjusted                | 1.191                              | 1.126                                 | 0.998                          | 0.772                                 | 0.728                          |
| [95%- CI]                  | [0.898 - 1.578]                    | [0.871 - 1.456]                       | [0.757 - 1.315]                | [0.571 - 1.044]                       | [0.505 - 1.050]                |
| Polyneuropathy, n (%)      | 263 (32.96%)                       | 360 (45.11%)                          | 263 (32.96%)                   | 153 (19.17%)                          | 121 (15.16%)                   |
| OR adjusted                | 1.005                              | 1.036                                 | 1.147                          | 0.853                                 | 1.401                          |
| [95%- CI]                  | [0.771 - 1.311]                    | [0.810 - 1.324]                       | [0.882 - 1.491]                | [0.635 - 1.146]                       | [0.979 - 2.006]                |
| PAD, n (%)                 | 175 (36.16%)                       | 233 (48.14%)                          | 172 (35.54%)                   | 97 (20.04%)                           | 84 (17.36%)                    |
| OR adjusted                | 1.229                              | 1.244                                 | 1.235                          | 0.914                                 | 1.331                          |
| [95%- CI]                  | [0.958 - 1.577 ]                   | [0.982 - 1.575]                       | [0.965 - 1.581]                | [0.685 - 1.220]                       | [0.961 - 1.843]                |
| Lymph edema, n (%)         | 110 (31.79%)                       | 158 (45.66%)                          | 113 (32.66%)                   | 87 (25.14%)                           | 55 (15.90%)                    |
| OR adjusted                | 1.084                              | 0.899                                 | 1.005                          | 1.266                                 | 1.124                          |
| [95%- CI]                  | [0.824 - 1.427]                    | [0.697 - 1.160]                       | [0.768 - 1.315]                | [0.944 - 1.698]                       | [0.792 - 1.594]                |
| Heart insufficiency, n (%) | 176 (36.44%)                       | 244 (50.52%)                          | 176 (36.44%)                   | 110 (22.77%)                          | 89 (18.43%)                    |
| OR adjusted                | 1.319                              | 1.435                                 | 1.326                          | 1.171                                 | 1.610                          |
| [95%- CI]                  | <b>[1.029 - 1.690]</b>             | <b>[1.136 - 1.813]</b>                | <b>[1.039 - 1.693]</b>         | [0.885 - 1.549]                       | <b>[1.168 - 2.218]</b>         |

*Notes.* Provided are the total numbers (n), rates (%), odd ratios (OR) adjusted for the listed of patient characteristics and comorbidities and the confidence intervals (CI). Bold numbers indicate p-value <0.05.
